# Supplementary material for: (Sea)ways of Perception: an Integrated Maritime-Terrestrial Approach to Modelling Prehistoric Seafaring
Source: Springer Nature journal article supplement (doi:10.1007/s10816-021-09536-4), 2021-09-21
Supplement: MOESM1 [file 10816_2021_9536_MOESM1_ESM.pdf]

| Environmental Data |                                     |                        |                                                          |                 |                                                                                                                                                                                                                                                                                                                                                                          |
|--------------------|-------------------------------------|------------------------|----------------------------------------------------------|-----------------|--------------------------------------------------------------------------------------------------------------------------------------------------------------------------------------------------------------------------------------------------------------------------------------------------------------------------------------------------------------------------|
| Data Source        | Data Set                            | Resolution/Scale       | Description                                              | Year            | Copyright                                                                                                                                                                                                                                                                                                                                                                |
| EDINA Digimap      | OS Terrain 5 DTM                    | 5 m / 1:10000          | Elevation data for the Outer Hebrides                    | 2018            | EDINA. Digimap Ordnance Survey University of Edinburgh. <a href="https://digimap.edina.ac.uk">https://digimap.edina.ac.uk</a>                                                                                                                                                                                                                                            |
| EDINA Digimap      | OS Terrain 50 DTM                   | 50 m / 1:50000         | Elevation data for Scotland                              | 2018            | EDINA. Digimap Ordnance Survey University of Edinburgh. <a href="https://digimap.edina.ac.uk">https://digimap.edina.ac.uk</a>                                                                                                                                                                                                                                            |
| EMODnet Bathymetry | EMODnet Digital Bathymetry (DTM)    | 1/16 * 1/16 arc-second | Bathymetric data around the Outer Hebrides               | 2018            | EMODnet Bathymetry Consortium (2018): EMODnet Digital Bathymetry (DTM). <a href="https://doi.org/10.12770/18ff0d48-b203-4a65-94a9-5fd8b0ec35f6">https://doi.org/10.12770/18ff0d48-b203-4a65-94a9-5fd8b0ec35f6</a>                                                                                                                                                        |
| GEBCO              | GEBCO 2020 Grid                     | 15 arc-seconds         | Bathymetric and topographic data for northwest Europe    | 2020            | GEBCO Compilation Group (2020) GEBCO 2020 Grid (doi:10.5285/a29c5465-b138-234d-e053-6c86abc040b9)                                                                                                                                                                                                                                                                        |
| HLAmap             | Historic Land Use Assessment        | 1:25000                | Landscape characterisation of the Outer Hebrides         | Downloaded 2020 | Historic Environment Scotland and Ordnance Survey data © Historic Environment Scotland - Scottish Charity No. SC045925 © Crown copyright and database right [2020]                                                                                                                                                                                                       |
| Sturt et al. 2013  | Glacial Isostatic Adjustment Values | 17340 m * 9273 m grid  | Glacial Isostatic Adjustment values for the year 4000 BC | 2013            | Sturt, F., Garrow, D., & Bradley, S. (2013). New models of North West European Holocene palaeogeography and inundation. <i>Journal of Archaeological Science</i> , 40(11), 3963–3976. <a href="https://doi.org/10.1016/j.jas.2013.05.023">https://doi.org/10.1016/j.jas.2013.05.023</a>                                                                                  |
| Ward et al. 2016   | Palaeotides                         | 1 km                   | Palaeotidal models for the year 4000 BC                  | 2016            | Ward, S. L., Neill, S. P., Scourse, J. D., Bradley, S. L., & Uehara, K. (2016). Sensitivity of palaeotidal models of the northwest European shelf seas to glacial isostatic adjustment since the Last Glacial Maximum. <i>Quaternary Science Reviews</i> . <a href="https://doi.org/10.1016/j.quascirev.2016.08.034">https://doi.org/10.1016/j.quascirev.2016.08.034</a> |

| Archaeological Data                                                             |                 |                            |         |          |            |                                                                                       |
|---------------------------------------------------------------------------------|-----------------|----------------------------|---------|----------|------------|---------------------------------------------------------------------------------------|
| NMRS Name                                                                       | Site Type       | Neolithic Materials        | Easting | Northing | Canmore ID | Reference                                                                             |
| 14 Neolithic sites used as origin and destination points in least-cost analysis |                 |                            |         |          |            |                                                                                       |
| Pigmie's Isle, Luchruban                                                        | Occupation area | Neolithic pottery, lithics | 150778  | 966013   | 4420       | <a href="https://canmore.org.uk/site/4420/">https://canmore.org.uk/site/4420/</a>     |
| Dunsbroc                                                                        | Occupation area | Neolithic pottery, lithics | 147130  | 962001   | 69532      | <a href="https://canmore.org.uk/site/69532/">https://canmore.org.uk/site/69532/</a>   |
| Loch Arnish                                                                     | Crannog         | Neolithic pottery          | 142300  | 930230   | 4316       | <a href="https://canmore.org.uk/site/4316/">https://canmore.org.uk/site/4316/</a>     |
| Loch Langavat                                                                   | Crannog         | Neolithic pottery          | 121680  | 943809   | 270908     | <a href="https://canmore.org.uk/site/270908/">https://canmore.org.uk/site/270908/</a> |
| Loch Bhorgastail                                                                | Crannog         | Neolithic pottery          | 121148  | 940955   | 359072     | <a href="https://canmore.org.uk/site/359072/">https://canmore.org.uk/site/359072/</a> |
| Northton                                                                        | Settlement      | Neolithic pottery, lithics | 97530   | 891229   | 10502      | <a href="https://canmore.org.uk/site/10502/">https://canmore.org.uk/site/10502/</a>   |
| Berneray Causeway, Screvan Quarry                                               | Occupation area | Neolithic pottery, lithics | 90500   | 879000   | 140108     | <a href="https://canmore.org.uk/site/140108/">https://canmore.org.uk/site/140108/</a> |
| Coileagan An Udail                                                              | Settlement      | Neolithic pottery, lithics | 82421   | 878431   | 10319      | <a href="https://canmore.org.uk/site/10319/">https://canmore.org.uk/site/10319/</a>   |
| Eilean an Tighe                                                                 | Occupation area | Neolithic pottery          | 222030  | 912580   | 4635       | <a href="https://canmore.org.uk/site/4635/">https://canmore.org.uk/site/4635/</a>     |
| Eilean Domhnuill                                                                | Crannog         | Neolithic pottery, lithics | 74696   | 875332   | 10069      | <a href="https://canmore.org.uk/site/10069/">https://canmore.org.uk/site/10069/</a>   |
| Barpa Langass                                                                   | Occupation area | Neolithic pottery, lithics | 83588   | 865888   | 296389     | <a href="https://canmore.org.uk/site/296389/">https://canmore.org.uk/site/296389/</a> |
| Bharpa Carinish                                                                 | Occupation area | Neolithic pottery, lithics | 83691   | 860374   | 10288      | <a href="https://canmore.org.uk/site/10288/">https://canmore.org.uk/site/10288/</a>   |
| An Doirinn                                                                      | Settlement      | Neolithic pottery, lithics | 73017   | 817340   | 9797       | <a href="https://canmore.org.uk/site/9797/">https://canmore.org.uk/site/9797/</a>     |
| Allt Chrisal                                                                    | Settlement      | Neolithic pottery, lithics | 64250   | 797740   | 86262      | <a href="https://canmore.org.uk/site/86262/">https://canmore.org.uk/site/86262/</a>   |

| Sites/materials referred to in the text                                                                      |                              |                     |        |        |        |                                                                                       |
|--------------------------------------------------------------------------------------------------------------|------------------------------|---------------------|--------|--------|--------|---------------------------------------------------------------------------------------|
| Loch Seaforth                                                                                                | Stone circle                 | Pottery, lithics    | 127810 | 916619 | 4135   | <a href="https://canmore.org.uk/site/4135/">https://canmore.org.uk/site/4135/</a>     |
| Lsfh 5.14 Sideval                                                                                            | Prehistoric cairn (possible) |                     | 128025 | 916708 | 335957 | <a href="https://canmore.org.uk/site/335957/">https://canmore.org.uk/site/335957/</a> |
| Sideval                                                                                                      | Standing stone               |                     | 127985 | 917345 | 336478 | <a href="https://canmore.org.uk/site/336478/">https://canmore.org.uk/site/336478/</a> |
| Lsfh 5.12 Sideval                                                                                            | Standing stone, carved stone |                     | 127909 | 917406 | 335941 | <a href="https://canmore.org.uk/site/335941/">https://canmore.org.uk/site/335941/</a> |
| Cleiter                                                                                                      | Standing stone               |                     | 128790 | 919699 | 133966 | <a href="https://canmore.org.uk/site/133966/">https://canmore.org.uk/site/133966/</a> |
| Beinn Chleiteir, A' Chlach Chrom                                                                             | Standing stone               |                     | 128870 | 919409 | 296381 | <a href="https://canmore.org.uk/site/296381/">https://canmore.org.uk/site/296381/</a> |
| Abhainn Na Muilne                                                                                            | Standing stone               |                     | 128881 | 919169 | 300740 | <a href="https://canmore.org.uk/site/300740/">https://canmore.org.uk/site/300740/</a> |
| Beinn Chleiteir                                                                                              | Stone circle                 |                     | 129181 | 919499 | 296383 | <a href="https://canmore.org.uk/site/296383/">https://canmore.org.uk/site/296383/</a> |
| Beinn Chleiteir                                                                                              | Standing stone               |                     | 129371 | 919480 | 300744 | <a href="https://canmore.org.uk/site/300744/">https://canmore.org.uk/site/300744/</a> |
| Balallan                                                                                                     | Find spot                    | Carved stone ball   | 128000 | 920001 | 4148   | <a href="https://canmore.org.uk/site/4148/">https://canmore.org.uk/site/4148/</a>     |
| Loch Airigh Na Ceardaich                                                                                     | Find spot                    | Stone axehead cache | 127699 | 922299 | 4147   | <a href="https://canmore.org.uk/site/4147/">https://canmore.org.uk/site/4147/</a>     |
| <p>*Additional sites/materials referenced in images can be found in Blankshein 2019, Ch.6 and Appendix B</p> |                              |                     |        |        |        |                                                                                       |
